# Supplementary material for: Detecting white spot lesions on post-orthodontic oral photographs using deep learning based on the YOLOv5x algorithm: a pilot study
Source: Springer Nature journal article supplement (doi:10.1186/s12903-024-04262-1), 2024-04-24
Supplement: MOESM1 [file 27012084]

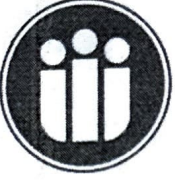

REPUBLIC OF TURKEY  
RECTORATE OF INONU UNIVERSITY  
Faculty of Dentistry Dean's Office

04/10/2023

Number: E-63482122-020--353233 Subject: About the Study.

Dear Assoc. Prof. Dr. Şuayip Burak DUMAN,  
Department Chair of Oral, Dental and Maxillofacial Radiology - Faculty Member

For the research you lead, titled "Detecting white spot lesions post-orthodontic oral photographs using deep learning based on the yolov5x algorithm: A pilot study", our faculty has provided no support. We kindly inform you of this.

Prof.Dr. Neslihan ŞİMŞEK  
Dean V.

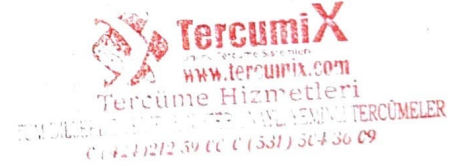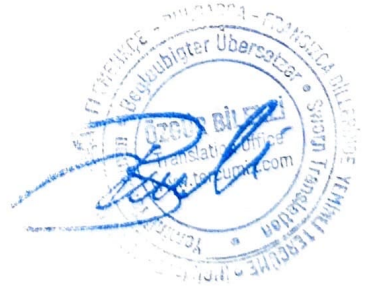

This document has been signed with secure electronic signature.

Document Verification Code:BSM85YVTE6 Pin Code:38082

Adress:İnönü Üniversitesi Diş Hekimliği Fakültesi(University Faculty of Dentistry)  
Telephone:0422 341 11 00 Faks:422 341 11 07  
e-Posta:dent@inonu.edu.tr Web:http://www.inonu.edu.tr/dishekimligi  
Kep Address:inonuuniversitesi@hs03.kep.tr

Document Tracking Address:  
<https://turkiye.gov.tr/ebd?eK=3837&eD=BSM85YVTE6&eS=353233>

For information Abdulrahim ÖZELÇİ  
Title: Registrar  
Telephone No:488 341 11 06

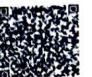

This document has been signed with secure electronic signature.
